# Supplementary material for: Flexible Textile-Based Organic Transistors Using Graphene/Ag Nanoparticle Electrode
Source: Nanomaterials (Basel). 2016 Aug 16;6(8):147. doi: 10.3390/nano6080147 (PMC5224629; doi:10.3390/nano6080147)
Supplement: Supplementary file 1 [file nanomaterials-06-00147-s001.pdf]

## Supplementary Materials: Flexible Textile-Based Organic Transistors Using Graphene/Ag Nanoparticle Electrode

Youn Kim, Yeon Ju Kwon, Kang Eun Lee, Youngseok Oh, Moon-Kwang Um, Dong Gi Seong and Jea Uk Lee

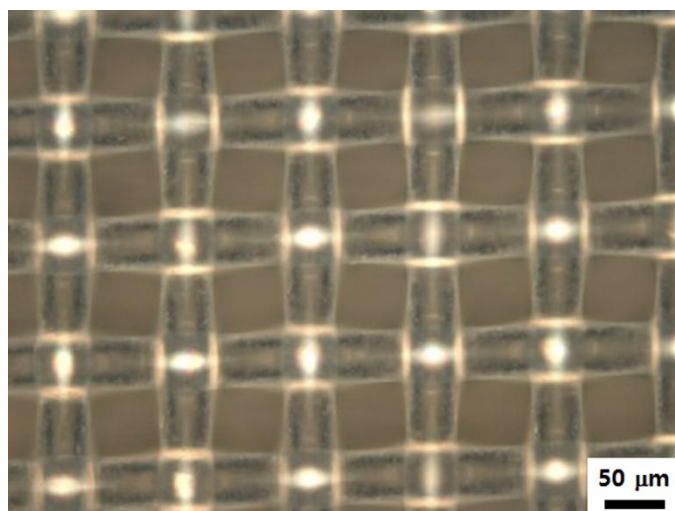

**Figure S1.** Optical microscopy (OM) image of monofilament polyethylene terephthalate (PET) textile.

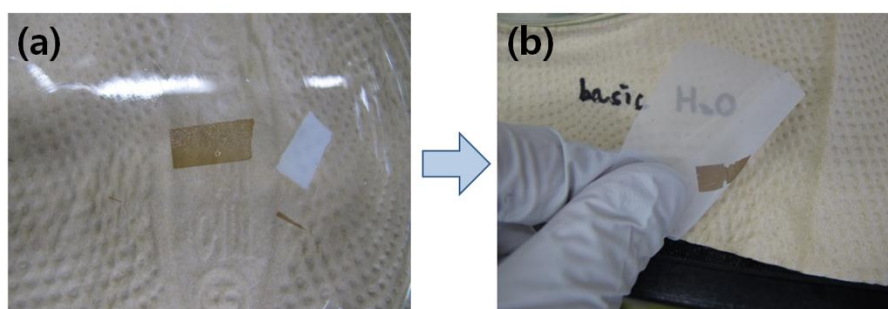

**Figure S2.** (a) Photographs of (a) floated graphene oxide (GO) film on NaOH solution; and (b) GO film completely combined with PET textile.

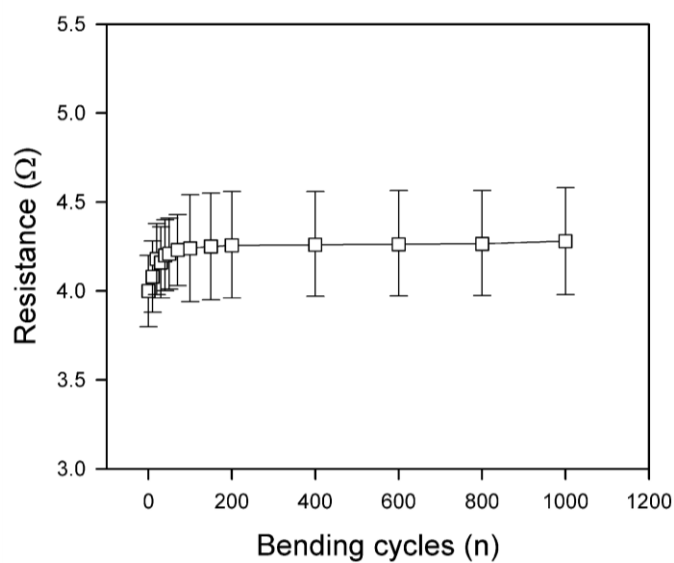

**Figure S3.** Electrical resistance change of the reduced graphene oxide/Ag Nanoparticle (rGO/AgNP) composite film on PET textile depending on the bending cycles.

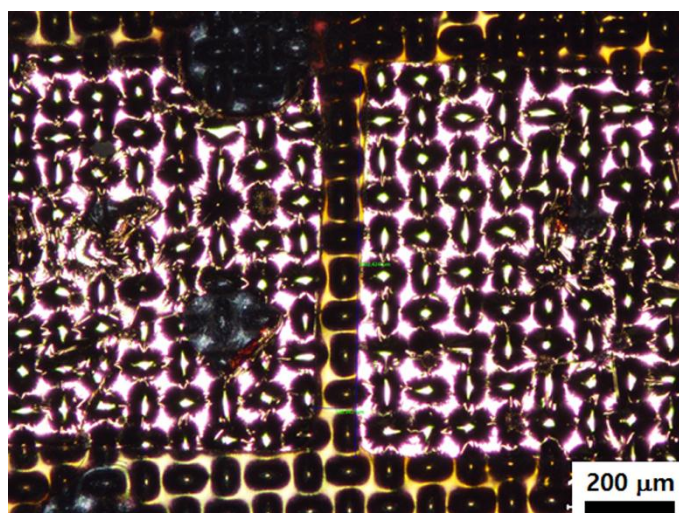

**Figure S4.** OM image of the textile-based transistor device after thermal annealing at 80 °C for 15 min.

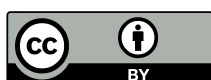

© 2016 by the authors. Submitted for possible open access publication under the terms and conditions of the Creative Commons Attribution (CC-BY) license (<http://creativecommons.org/licenses/by/4.0/>).
